# Supplementary material for: Edge Principal Components and Squash Clustering: Using the Special Structure of Phylogenetic Placement Data for Sample Comparison
Source: PLOS journal article supplement (doi:10.1371/journal.pone.0056859), 2013-03-11

squash tree

## UPGMA tree

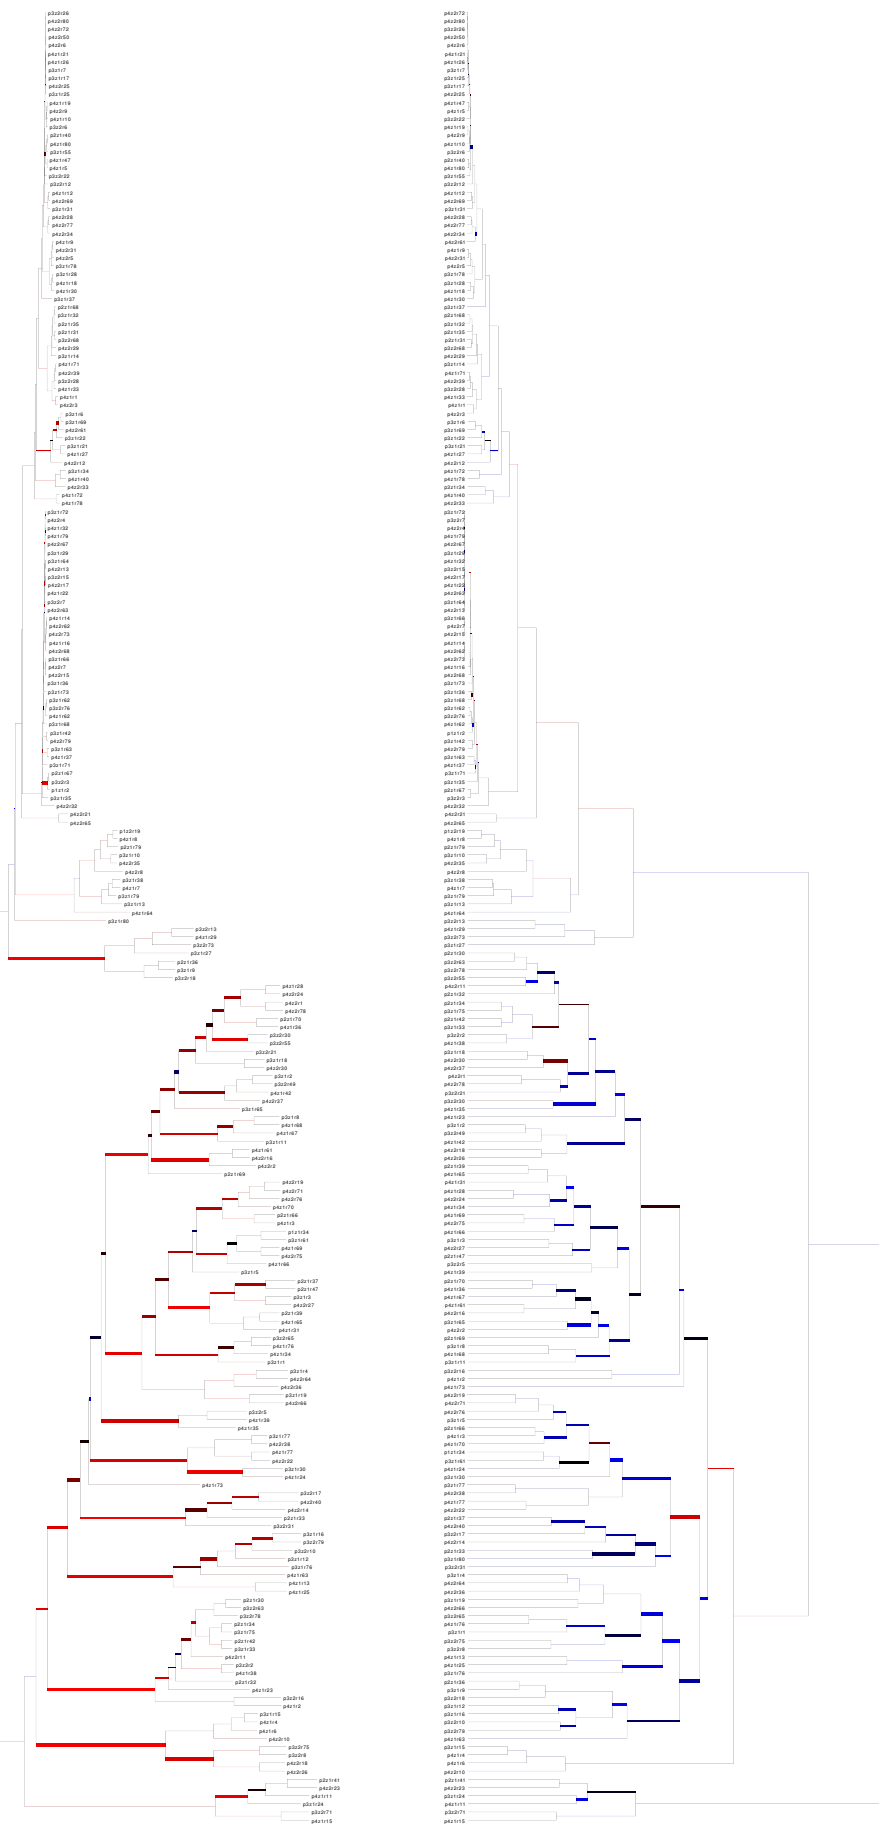

Supplement: S1 (10.1371/journal.pone.0056859.s001) [file journal.pone.0056859.s001]
